# Supplementary material
Source: MDPI journal article supplement (https://www.mdpi.com/1099-4300/23/7/839)
Supplement: s1 [file s1]

# Supplementary Material

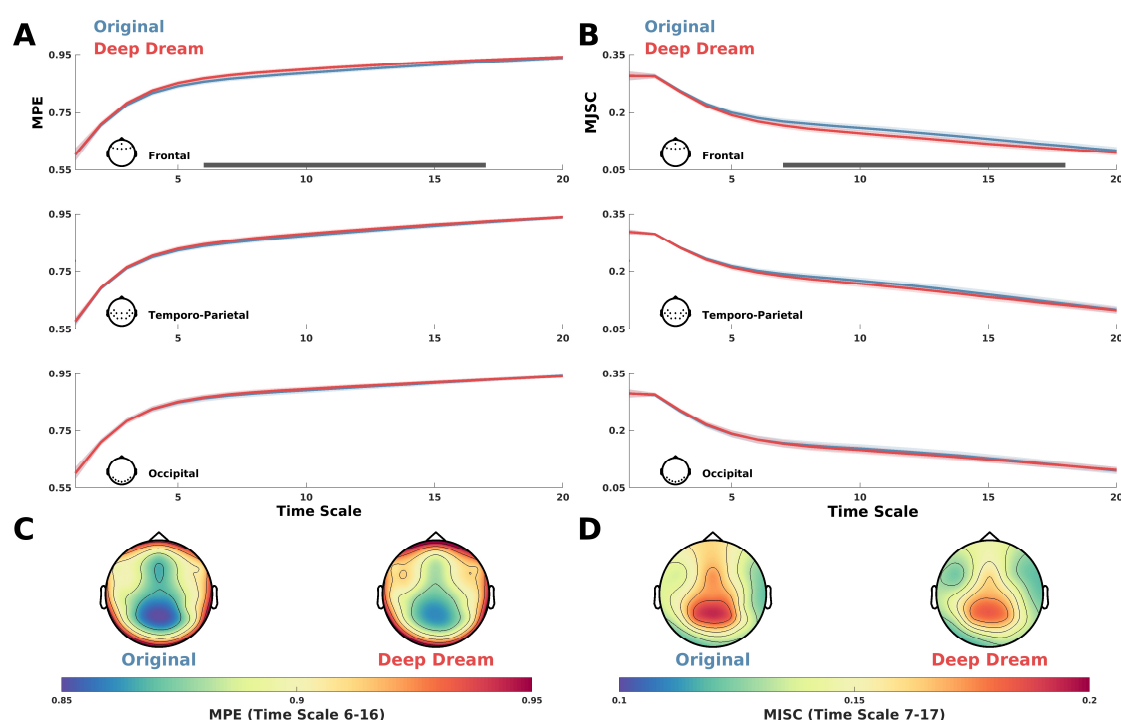

**Figure S1.** (A) MPE values for DD and OR along the time scales in the frontal, temporo-parietal and occipital ROI. Shaded areas represent standard error of the mean. Gray lines indicate statistical significance ( $p < 0.05$ , cluster corrected). (B) MJSC values for DD and OR along the time scales in the frontal, temporo-parietal and occipital ROI. Shaded areas represent standard error of the mean. Gray lines indicate statistical significance ( $p < 0.05$ , cluster corrected). (C) Topographic maps depicting the MPE of DD and OR in the significant time scale range 6–16. (D) Topographic maps depicting the MJSC of DD and OR in the significant time scale range 7–17.

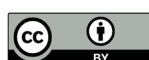

Copyright: © 2021 by the authors. Licensee MDPI, Basel, Switzerland. This article is an open access article distributed under the terms and conditions of the Creative Commons Attribution (CC BY) license (<http://creativecommons.org/licenses/by/4.0/>).

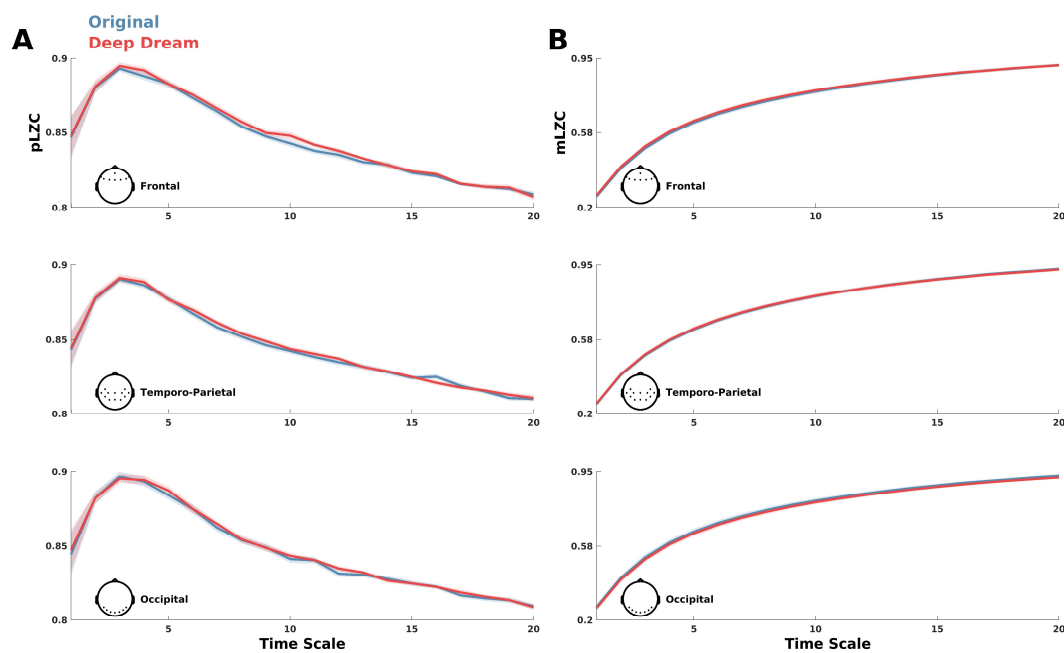

**Figure S2.** (A) pLZC values for DD and OR along the time scales in the frontal, temporo-parietal and occipital ROI. Shaded areas represent standard error of the mean. (B) mLZC values for DD and OR along the time scales in the frontal, temporo-parietal and occipital ROI. Shaded areas represent standard error of the mean.
